# Supplementary material for: Influence of Culture Media Formulated with Agroindustrial Wastes on the Antimicrobial Activity of Lactic Acid Bacteria
Source: PubMed Central journal article supplement (PMC9628826; doi:10.4014/jmb.2107.07030), 2021-10-20
Supplement: jmb-32-1-64-supple.pdf [file jmb-32-1-64-supple.pdf]

## Supplementary Table

**Table 4. Antimicrobial activity of the cell-free supernatant from lactic acid bacteria grown in media formulated with agroindustrial wastes.**

|           | <b>FOB</b>                |                           |                           |                            |                            |                           |                            |                           |
|-----------|---------------------------|---------------------------|---------------------------|----------------------------|----------------------------|---------------------------|----------------------------|---------------------------|
|           | <b>ELO8</b>               | <b>PIM5</b>               | <b>CAL14</b>              | <b>PIM4</b>                | <b>JAV15</b>               | <b>TOV9</b>               | <b>PEP11</b>               | <b>PEP12</b>              |
| <b>Bc</b> | -8.2±10 <sup>abc</sup>    | 35.5±4.5 <sup>ab</sup>    | -14.7±20.2 <sup>abc</sup> | -5±9.4 <sup>abc</sup>      | -84.5±13.9 <sup>cd</sup>   | -84.1± 18.2 <sup>cd</sup> | -27.1±13.4 <sup>bcd</sup>  | -16.3±18.9 <sup>abc</sup> |
| <b>Lm</b> | 15±2 <sup>ab</sup>        | 46.7±8.6 <sup>ab</sup>    | -27.7±19.4 <sup>abc</sup> | -154.1±18.8 <sup>cd</sup>  | -3.9±31.1 <sup>ab</sup>    | 4.8±27.6 <sup>ab</sup>    | -132±23.2 <sup>bc</sup>    | -21.5±15.8 <sup>abc</sup> |
| <b>Sa</b> | -549±78.2 <sup>d</sup>    | -255±70.9 <sup>cd</sup>   | -81.3±22.4 <sup>abc</sup> | -116.3±44.2 <sup>abc</sup> | -30.6±24.6 <sup>ab</sup>   | -9.7±24.2 <sup>ab</sup>   | -215.6±10.2 <sup>bc</sup>  | -66.3±9 <sup>abc</sup>    |
| <b>Ca</b> | 5.2±1.9 <sup>a</sup>      | 39±5.5 <sup>a</sup>       | 9.17±5.5 <sup>a</sup>     | -0.6±8.7 <sup>a</sup>      | 24.9±13.8 <sup>a</sup>     | 21.7±17.4 <sup>a</sup>    | 3.1±18.5 <sup>a</sup>      | 10.6±20.2 <sup>a</sup>    |
| <b>Sc</b> | -2.2±5.9 <sup>a</sup>     | 45.2±14.9 <sup>a</sup>    | 9.64±2.5 <sup>a</sup>     | -1.5±22.3 <sup>a</sup>     | 13.3±14.6 <sup>a</sup>     | 14.2±17.4 <sup>a</sup>    | -1.4±14.2 <sup>a</sup>     | 19.3±20 <sup>a</sup>      |
| <b>Ct</b> | -72.3±15.4 <sup>ade</sup> | 49.2±15.1 <sup>cde</sup>  | 6.58±13.9 <sup>bcd</sup>  | -3.6±13.1 <sup>abcde</sup> | 10.3±5.8 <sup>bcd</sup>    | 10.6±9.8 <sup>bcd</sup>   | -24.9±2.2 <sup>abcde</sup> | 18.6±5.6 <sup>bcd</sup>   |
| <b>An</b> | -1.5±5.6 <sup>ab</sup>    | -41.6±15.5 <sup>abc</sup> | 0.2±1.1 <sup>ab</sup>     | 29.2±25.2 <sup>ab</sup>    | -111.1±23.3 <sup>cde</sup> | -138.7±12.5 <sup>de</sup> | -68.7±4.9 <sup>bcd</sup>   | -70.6±4.5 <sup>bcd</sup>  |
| <b>Fo</b> | 13.4±11.5 <sup>abc</sup>  | 6.1±6.6 <sup>abc</sup>    | -4.4±6.1 <sup>abc</sup>   | -3.4±8.15 <sup>abc</sup>   | -103.6±37.8 <sup>cde</sup> | -94.1±43.7 <sup>cde</sup> | -30,3±38.3 <sup>abc</sup>  | -77.8±14.7 <sup>bcd</sup> |
| <b>Pe</b> | 7.4±13.1 <sup>a</sup>     | -14.5±5.1 <sup>a</sup>    | -24.7±27.1 <sup>a</sup>   | -27.4±10.3 <sup>a</sup>    | -215.1±66.3 <sup>b</sup>   | -218.5±47.7 <sup>b</sup>  | -153.5±50.6 <sup>b</sup>   | -209.2±31.4 <sup>b</sup>  |
|           | <b>CWB</b>                |                           |                           |                            |                            |                           |                            |                           |
| <b>Bc</b> | 5±8.5 <sup>a</sup>        | 39.5±6.6 <sup>a</sup>     | 47.9±27.4 <sup>a</sup>    | 56.2±22.7 <sup>a</sup>     | 7±39.9 <sup>a</sup>        | 19.3±47.7 <sup>a</sup>    | 15.5±17.5 <sup>a</sup>     | 25.5±1.7 <sup>a</sup>     |
| <b>Lm</b> | 20.7±12.1 <sup>abc</sup>  | 45.9±4.3 <sup>abc</sup>   | 56.5±34.9 <sup>a</sup>    | -54±58.6 <sup>abc</sup>    | -1.1±4.5 <sup>abc</sup>    | -44.3±99.6 <sup>abc</sup> | -69.9±40.3 <sup>c</sup>    | 13.9±8.1 <sup>abc</sup>   |
| <b>Sa</b> | -572.6±112.2 <sup>b</sup> | -459.1±28 <sup>b</sup>    | -57.5±38.4 <sup>a</sup>   | -64.8±12.2 <sup>a</sup>    | -54.8±16 <sup>a</sup>      | -76.3±27.9 <sup>a</sup>   | -166.6±18 <sup>a</sup>     | -73±14 <sup>a</sup>       |
| <b>Ca</b> | 4.1±1.4 <sup>abc</sup>    | 34.4±7.7 <sup>ab</sup>    | 6.8±20 <sup>abc</sup>     | 40.5±4.6 <sup>ab</sup>     | 31.1±7.2 <sup>abc</sup>    | 35.4±7.7 <sup>ab</sup>    | -9.2±21.7 <sup>ac</sup>    | 39.5±5.7 <sup>abc</sup>   |
| <b>Sc</b> | 12.3±2 <sup>a</sup>       | 43.1±11.5 <sup>a</sup>    | 14.9±9.7 <sup>a</sup>     | 15.8±8.2 <sup>a</sup>      | 30.7±10.7 <sup>a</sup>     | 32.7±10.8 <sup>a</sup>    | 19.5±15.3 <sup>a</sup>     | 47.2±6 <sup>a</sup>       |

|             |                              |                               |                             |                             |                             |                             |                              |                              |
|-------------|------------------------------|-------------------------------|-----------------------------|-----------------------------|-----------------------------|-----------------------------|------------------------------|------------------------------|
| <b>Ct</b>   | -31.5 ± 29.9 <sup>cde</sup>  | 13.6 ± 3.7 <sup>abcde</sup>   | 48.7 ± 1.1 <sup>abc</sup>   | 34.7 ± 16.5 <sup>abcd</sup> | 23.3 ± 3.1 <sup>abcd</sup>  | 26.7 ± 6.2 <sup>abcd</sup>  | -8.2 ± 11 <sup>bcde</sup>    | 32.5 ± 3.6 <sup>abcd</sup>   |
| <b>An</b>   | -128.3 ± 2.9 <sup>cd</sup>   | -2.3 ± 12.6 <sup>ab</sup>     | -202.8 ± 44.6 <sup>e</sup>  | -13.8 ± 14.8 <sup>ab</sup>  | -79.7 ± 31.7 <sup>bcd</sup> | -117.7 ± 29.9 <sup>cd</sup> | -92.2 ± 7.5 <sup>bcd</sup>   | -50.9 ± 2.8 <sup>abc</sup>   |
| <b>Fo</b>   | 16 ± 7.2 <sup>a</sup>        | 23.3 ± 3.4 <sup>a</sup>       | -3.6 ± 4.9 <sup>a</sup>     | -2.8 ± 4.6 <sup>a</sup>     | -129.6 ± 19.7 <sup>b</sup>  | -114.5 ± 30.1 <sup>b</sup>  | -9 ± 19.3 <sup>a</sup>       | -24.2 ± 17.4 <sup>a</sup>    |
| <b>Pe</b>   | -1.1 ± 3.3 <sup>a</sup>      | 6.3 ± 11.9 <sup>a</sup>       | -33.7 ± 2.7 <sup>a</sup>    | -29.9 ± 7.3 <sup>a</sup>    | -155.5 ± 66 <sup>b</sup>    | -171.1 ± 50.6 <sup>b</sup>  | -172 ± 7.2 <sup>b</sup>      | -117.3 ± 3.2 <sup>b</sup>    |
| <b>FFB</b>  |                              |                               |                             |                             |                             |                             |                              |                              |
| <b>Bc</b>   | 0.0 ± 7.8 <sup>ab</sup>      | -20.8 ± 17.9 <sup>abc</sup>   | 91.1 ± 20.6 <sup>d</sup>    | 11.7 ± 23.7 <sup>ab</sup>   | -62.8 ± 7.7 <sup>bc</sup>   | -60.8 ± 8.8 <sup>bc</sup>   | -22.8 ± 11.5 <sup>abc</sup>  | -15.9 ± 9.5 <sup>bcd</sup>   |
| <b>Lm</b>   | 0.8 ± 8.3 <sup>abc</sup>     | 27.9 ± 21 <sup>abc</sup>      | 114.2 ± 53.5 <sup>ab</sup>  | -127.3 ± 39.6 <sup>cd</sup> | 18.7 ± 49.1 <sup>abc</sup>  | 17.8 ± 38 <sup>abc</sup>    | -63.4 ± 99.8 <sup>bc</sup>   | 4.6 ± 72.7 <sup>abc</sup>    |
| <b>Sa</b>   | -380.2 ± 42.6 <sup>c</sup>   | -255 ± 70.9 <sup>bc</sup>     | -11.8 ± 22.4 <sup>ab</sup>  | -127.3 ± 33.8 <sup>ab</sup> | 5.4 ± 28 <sup>ab</sup>      | -3.2 ± 14.2 <sup>ab</sup>   | -121 ± 112 <sup>ab</sup>     | -63 ± 121.7 <sup>ab</sup>    |
| <b>Ca</b>   | 26 ± 5.3 <sup>bcde</sup>     | 39 ± 5.5 <sup>abcde</sup>     | 74.6 ± 2.6 <sup>abc</sup>   | 25.1 ± 12 <sup>bcde</sup>   | 75.5 ± 3.6 <sup>abc</sup>   | 67.1 ± 2.8 <sup>abcd</sup>  | 20 ± 42.4 <sup>cde</sup>     | 55.2 ± 32.8 <sup>abcde</sup> |
| <b>Sc</b>   | 47.5 ± 25.7 <sup>ab</sup>    | 45.2 ± 14.9 <sup>ab</sup>     | 80.4 ± 6.7 <sup>ab</sup>    | -11.5 ± 7.7 <sup>a</sup>    | 75.5 ± 7.5 <sup>ab</sup>    | 73.7 ± 5.9 <sup>ab</sup>    | 31 ± 48.9 <sup>abc</sup>     | -63 ± 121.7 <sup>ab</sup>    |
| <b>Ct</b>   | 37.3 ± 17.4 <sup>abcde</sup> | 49.2 ± 15.1 <sup>abc</sup>    | 62.8 ± 3.4 <sup>abcd</sup>  | -3.2 ± 5.7 <sup>cde</sup>   | 78.3 ± 8 <sup>abc</sup>     | 72.8 ± 5.3 <sup>abc</sup>   | 21.1 ± 35.9 <sup>bcde</sup>  | 41.1 ± 45.4 <sup>abcde</sup> |
| <b>An</b>   | -45.9 ± 9.2 <sup>bc</sup>    | -41.6 ± 15.5 <sup>bc</sup>    | -7.5 ± 2.8 <sup>bc</sup>    | 50.2 ± 13.5 <sup>a</sup>    | -107.3 ± 6.7 <sup>de</sup>  | -99.6 ± 4.3 <sup>cde</sup>  | -41 ± 14.6 <sup>bc</sup>     | -47.1 ± 3.8 <sup>bcd</sup>   |
| <b>Fo</b>   | -0.3 ± 1.5 <sup>a</sup>      | 6.1 ± 6.6 <sup>a</sup>        | 11.8 ± 3.8 <sup>a</sup>     | -2.2 ± 4.7 <sup>a</sup>     | -130.2 ± 40.4 <sup>b</sup>  | -126 ± 9.6 <sup>b</sup>     | -42.2 ± 46.7 <sup>a</sup>    | -48.9 ± 24.4 <sup>a</sup>    |
| <b>Pe</b>   | -16.9 ± 4.6 <sup>a</sup>     | -14.5 ± 5.1 <sup>a</sup>      | -18.6 ± 5.9 <sup>a</sup>    | -27.8 ± 12.8 <sup>a</sup>   | -223.3 ± 12.1 <sup>b</sup>  | -217.1 ± 16.4 <sup>b</sup>  | -154.1 ± 56.4 <sup>b</sup>   | -187.1 ± 22.3 <sup>b</sup>   |
| <b>MRS</b>  |                              |                               |                             |                             |                             |                             |                              |                              |
| <b>Bc*</b>  | 7.6 ± 22.8 <sup>a</sup>      | -1.6 ± 12.6 <sup>a</sup>      | -4.5 ± 8.2 <sup>a</sup>     | -16.8 ± 2.8 <sup>a</sup>    | -42.7 ± 34.1 <sup>a</sup>   | -46.9 ± 10.2 <sup>a</sup>   | -1.8 ± 15.7 <sup>a</sup>     | -19.2 ± 9.6 <sup>a</sup>     |
| <b>Lm†</b>  | 22.3 ± 9.5 <sup>abc</sup>    | 40 ± 11 <sup>ab</sup>         | -18.4 ± 13.2 <sup>abc</sup> | -41.5 ± 17.3 <sup>abc</sup> | -40.8 ± 29.2 <sup>abc</sup> | -69.6 ± 25.7 <sup>abc</sup> | -93.7 ± 6.3 <sup>bc</sup>    | -12.5 ± 7.6 <sup>abc</sup>   |
| <b>Sa‡</b>  | -504.7 ± 33 <sup>f</sup>     | -235.9 ± 90.8 <sup>bcde</sup> | -9.1 ± 22.2 <sup>abc</sup>  | -47.8 ± 13.6 <sup>abc</sup> | -73.4 ± 30.9 <sup>abc</sup> | -82.6 ± 23.7 <sup>abc</sup> | -248.3 ± 7.7 <sup>cde</sup>  | -104.3 ± 52.5 <sup>abc</sup> |
| <b>Ca§</b>  | -1 ± 1 <sup>bc</sup>         | 10.1 ± 10.4 <sup>abc</sup>    | 47.3 ± 7 <sup>ab</sup>      | 55.9 ± 4.7 <sup>ab</sup>    | 28.5 ± 26.6 <sup>abc</sup>  | 29.6 ± 10.2 <sup>abc</sup>  | 15.9 ± 18.6 <sup>abc</sup>   | 37.4 ± 10.6 <sup>abc</sup>   |
| <b>Sc¶</b>  | 21 ± 8.1 <sup>a</sup>        | 20.3 ± 8.1 <sup>a</sup>       | 16.4 ± 6.1 <sup>a</sup>     | 5.4 ± 2.5 <sup>a</sup>      | 11 ± 16.3 <sup>a</sup>      | 19 ± 9 <sup>a</sup>         | 5.2 ± 9.5 <sup>a</sup>       | 31.8 ± 8.7 <sup>a</sup>      |
| <b>Ct**</b> | -61.6 ± 5.1 <sup>cde</sup>   | -37.1 ± 7.7 <sup>bcde</sup>   | 20.7 ± 10.9 <sup>abc</sup>  | 12.1 ± 3.8 <sup>abcd</sup>  | 5.6 ± 6.7 <sup>abcd</sup>   | 7.9 ± 4 <sup>abcd</sup>     | -27.7 ± 2.9 <sup>abcde</sup> | 9.4 ± 2.3 <sup>abcd</sup>    |

|             |                           |                           |                           |                          |                           |                            |                             |                          |
|-------------|---------------------------|---------------------------|---------------------------|--------------------------|---------------------------|----------------------------|-----------------------------|--------------------------|
| <b>An††</b> | 39.2±30.4 <sup>a</sup>    | 39.4±3.6 <sup>a</sup>     | 58.3±5 <sup>a</sup>       | 56.3±4.4 <sup>a</sup>    | -121.5±9.4 <sup>d</sup>   | -64.2±31.2 <sup>bc</sup>   | 20.6±2.9 <sup>abc</sup>     | -59.4±4.8 <sup>bc</sup>  |
| <b>Fo‡‡</b> | 33.7±24.9 <sup>abc</sup>  | 47.1±10.3 <sup>abc</sup>  | 22.2±16.7 <sup>abc</sup>  | 34.7±23 <sup>abc</sup>   | -86.5±47.4 <sup>cde</sup> | -68.7±11.5 <sup>bcde</sup> | -16.2±27.6 <sup>abcde</sup> | -5.5±6.9 <sup>abcd</sup> |
| <b>Pe§§</b> | 32.2±26.9 <sup>abcd</sup> | 17.7±13.1 <sup>abcd</sup> | 33.4±17.9 <sup>abcd</sup> | 40.6±11.1 <sup>abc</sup> | -116±47.5 <sup>cde</sup>  | -57.9±21.6 <sup>bcde</sup> | -22.2±32.2 <sup>abcde</sup> | -119.2±15 <sup>cde</sup> |

Classification of Antimicrobial activity: > 50 % = strong inhibition; 15- 50 % = moderate inhibition; <14.99 % = No inhibition.

Culture media: FOB: Forage oats broth, CWB: Cheese whey broth, FFB: Flour fish broth.

Indicator microorganisms: \**Bc*: *B. cereus*, †*Lm*: *L. monocytogenes*, ‡*Sa*: *S. aureus*, §*Ca*: *C. albicans*, ¶*Sc*: *S. cerevisiae*, \*\**Ct*: *C. tropicalis*, ††*n*: *A. niger*, ‡‡*Fo*: *F. oxysporum*, §§*Pe*: *P. expansum*.

Different letters correspond to significant differences on each row, for each growth media analyzed  $P < 0.05$ .
